# Supplementary material for: Identification of cadmium resistance and adsorption gene from Escherichia coli BL21 (DE3)
Source: Royal Society of Chemistry journal article supplement (doi:10.1039/c7ra10656d), 2017-01-01
Supplement: c7ra10656d1.pdf [file c7ra10656d1.pdf]

Table.S1 The primers used in this study.

| Primer name         | Primer sequence (5'-3')       |
|---------------------|-------------------------------|
| <i>capA</i> -up     | GGGGTACCCTGACATTTTCGGTGCGAG   |
| <i>capA</i> -down   | GCTCTAGATTCATCCTCTCCGGATAAGGC |
| <i>capB</i> -up     | GGGGTACCTCGACTCCCAGCTGG       |
| <i>capB</i> -down   | GCTCTAGACGCAGCTCTGCTGTC       |
| <i>capJ</i> -up     | GGGGTACCAGTCGTGCGGCTTCG       |
| <i>capJ</i> -down   | GCTCTAGAGACCACGCTGATGCC       |
| <i>regI</i> -up     | GGGGTACCGATGGTCTGAAAGAAGT     |
| <i>regI</i> -down   | GCTCTAGAAACGATGCTGATTGC       |
| <i>regII</i> -up    | GGGGTACCTGACCAGACCAGC         |
| <i>regII</i> -down  | GCTCTAGAGCGGCGACGGTTA         |
| <i>regIII</i> -up   | GGGGTACCTGGATGCGTGGAT         |
| <i>regIII</i> -down | GCTCTAGAGCCATACCGGACT         |
| Fosmid-T7           | TAATACGACTCACTATAGGG          |
| Fosmid-RP           | CTCGTATGTTGTGTGGAATTGTGAGC    |

Table.S2 The isoelectric points of all the overexpressed genes.

| Gene name     | Isoelectric point (pI) |
|---------------|------------------------|
| <i>capB</i>   | 5.72                   |
| <i>capC</i>   | 4.76                   |
| <i>capD</i>   | 5.52                   |
| <i>capE</i>   | 5.29                   |
| <i>capFi</i>  | 4.55                   |
| <i>capFii</i> | 4.77                   |
| <i>capV</i>   | 4.98                   |
| <i>capG</i>   | 5.05                   |
| <i>capT</i>   | 4.35                   |

Fig.S1

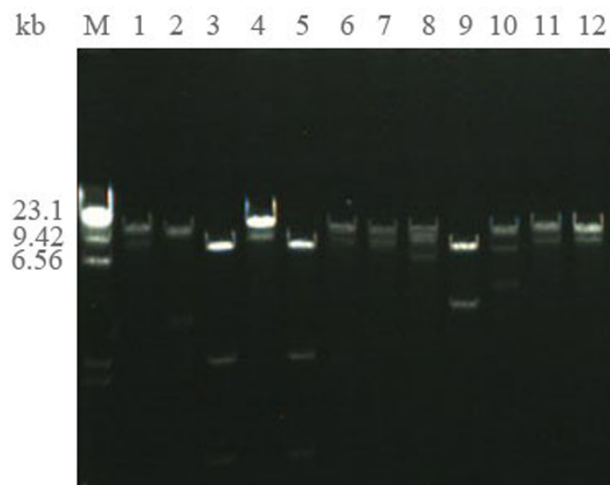

Fig.S1 Agarose electrophoresis of fosmid plasmid after BamHI digestion. Bands 1-12 were plasmids for randomly selected strains. All of the lanes 1-12 contains a vector strip at about 8kb location, the size of other strips are different.

Fig.S2

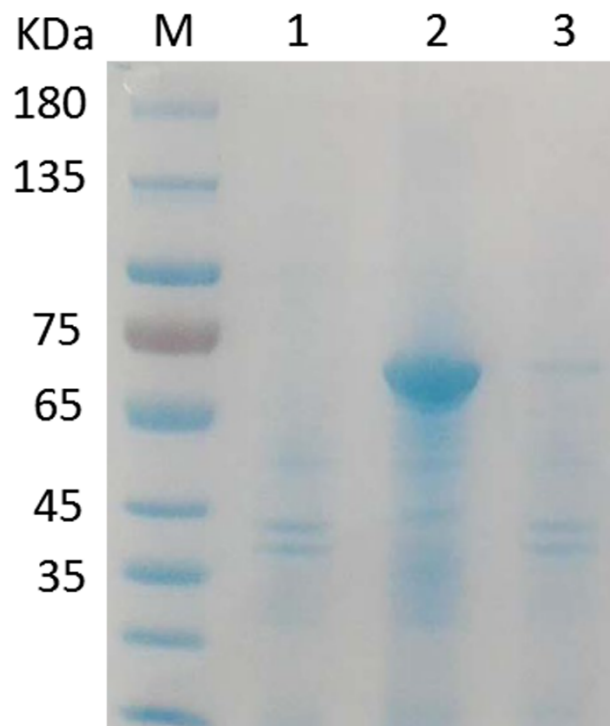

Fig.S2 The SDS-PAGE of the CapB protein overexpressed strains. 1: negative control strains BL21-pUC19-GFP(empty vector) 2: *capB* was constructed into the vector pET30a as a positive control (T7 as promoter) 3: *capB* was constructed into the vector pUC19 using its own promoter. In the position of 70KDa, compared with negative control, *capB* gene expression quantity increased significantly of at lane 2 and 3.
